# Supplementary material for: Severe COVID-19 associated hyperglycemia is caused by beta cell dysfunction: a prospective cohort study
Source: PubMed Central journal article supplement (PMC10352285; doi:10.1038/s41387-023-00241-7), 2023-07-17
Supplement: 41387_2023_241_MOESM1_ESM.pdf [file 41387_2023_241_MOESM1_ESM.pdf]

## **Severe COVID-19 associated hyperglycemia is caused by beta cell dysfunction: a prospective cohort study**

Jan Gojda<sup>1\*</sup>, Kateřina Koudelková<sup>1</sup>, Anna Ouřadová<sup>1</sup>, Alexander Lang<sup>2,3</sup>, Magdaléna Krbcová<sup>1</sup>, Alexandra Gvozdeva<sup>1</sup>, Viktor Šebo<sup>4</sup>, Lotte Slagmolen<sup>5</sup>, Jana Potočková<sup>1</sup>, Petr Tůma<sup>6</sup>, Lenka Rossmeislová<sup>2</sup>, Michal Anděl<sup>1</sup>, Fredrik Karpe<sup>7</sup>, Sabrina Schlesinger<sup>3,4</sup>

1/ Dept. of Internal Medicine, Third Faculty of Medicine, Charles University, and Královské Vinohrady University Hospital, Prague, Czech Rep.

2/ Institute for Biometrics and Epidemiology, German Diabetes Center (Deutsches Diabetes-Zentrum/DDZ), Leibniz Center for Diabetes Research at Heinrich Heine University Düsseldorf, Düsseldorf, Germany.

3/ German Center for Diabetes Research (DZD), Partner Düsseldorf, Düsseldorf, Germany.

4/ Dept. of Pathophysiology, Third Faculty of Medicine, Charles University, Prague, Czech Rep.

5/ Faculty of Movement and Rehabilitation Sciences, Katholieke Universiteit Leuven, Belgium

6/ Department of Hygiene, Third Faculty of Medicine, Charles University, Prague, Czech Rep.

7/ Oxford Center for Diabetes, Endocrinology, and Metabolism, University of Oxford, United Kingdom

\*Corresponding author: Jan Gojda, MD, Ph.D., Department of Internal Medicine, Kralovske Vinohrady University Hospital and Third Faculty of Medicine, Charles University, Prague, Czech Republic. e-mail: [jan.gojda@lf3.cuni.cz](mailto:jan.gojda@lf3.cuni.cz)

### **Keywords**

Sars-CoV-2, hyperglycemia, diabetes, insulin resistance, beta cell dysfunction, hypermetabolism

**Supplement Table 1:** Sensitivity Analysis: Clinical characteristics of the full data-set population (n=37)

|                                         | T0<br>Baseline     | T3<br>Visit after 3 months | T6<br>Visit after 6 months | p       |
|-----------------------------------------|--------------------|----------------------------|----------------------------|---------|
| n                                       | 37                 | 32                         | 31                         | -       |
| Age [years]                             | 56.3 ± 10.3        | 56.8 ± 10.6                | 57.7 ± 9.9                 | -       |
| Sex [n female, %]                       | 14 (38%)           | 13 (41%)                   | 11 (36%)                   | -       |
| Prevalence hyperglycemia [n, %]         | 22 (59%)           | n.a.                       | 14 (45%)                   | 0.06    |
| BMI [kg/m <sup>2</sup> ]                | 30.5 ± 5.1         | 31.6 ± 4.9                 | 31.4 ± 4.4                 | <0.0001 |
| Body weight [kg]                        | 90.6 ± 16.4        | 93.9 ± 14.7                | 94.9 ± 14.1                | <0.0001 |
| WHR                                     | 0.94 ± 0.08        | 0.92 ± 0.08                | 0.92 ± 0.08                | 0.05    |
| Fat mass [%]                            | 25 ± 10            | 24 ± 10                    | 26 ± 12                    | 0.36    |
| Systolic blood pressure [mmHg]          | 131 ± 15           | 131 ± 16                   | 134 ± 17                   | 0.59    |
| Diastolic blood pressure [mmHg]         | 84 ± 7             | 84 ± 9                     | 84 ± 9                     | 0.93    |
| First random glucose [mmol/L]           | 6.3 (5.9, 7.2)     | -                          | -                          | -       |
| Fasting glucose [mmol/L]                | 5.3 ± 1.1          | 5.7 ± 0.5                  | 5.4 ± 0.6                  | 0.66    |
| Glucose after 2 hours [mmol/L]          | 8.5 ± 2.6          | n.a.                       | 7.4 ± 1.7                  | <0.001  |
| Fasting insulin [mIU/L]                 | 11.3 (9.1, 15.8)   | 14.6 (11.4, 16.9)          | 7.7 (6.2, 13.4)            | 0.003   |
| Insulin after 2 hours [mIU/L]           | 85.6 (49.5, 109.2) | n.a.                       | 41.9 (24.6, 113.5)         | 0.02    |
| Fasting C-peptide [pmol/L]              | 910 ± 336          | 697 ± 252                  | 543 ± 206                  | <0.0001 |
| C-peptide after 2 hours [pmol/L]        | 3386 ± 1008        | n.a.                       | 2152 ± 759                 | <0.0001 |
| Fasting NEFA [mmol/L]                   | 0.93 ± 0.25        | n.a.                       | 0.74 ± 0.26                | 0.001   |
| NEFA after 2 hours [mmol/L]             | 0.55 ± 0.20        | n.a.                       | 0.32 ± 0.14                | <0.0001 |
| Fasting glycerol [μmol/L]               | 251 ± 71           | n.a.                       | 153 ± 45                   | <0.0001 |
| Glycerol after 2 hours [μmol/L]         | 215 ± 62           | n.a.                       | 118 ± 25                   | <0.0001 |
| Insulinogenic index                     | 1.32 (0.85, 2.68)  | n.a.                       | 1.21 (0.81, 1.77)          | 0.62    |
| Insulin sensitivity index               | 3.29 ± 1.51        | n.a.                       | 4.75 ± 2.41                | <0.001  |
| Disposition Index                       | 4.36 (2.12, 8.68)  | n.a.                       | 5.21 (3.00, 7.23)          | 0.37    |
| HOMA-beta                               | 1.48 (1.12, 2.00)  | n.a.                       | 1.01 (0.81, 1.83)          | 0.003   |
| HOMA-IR                                 | 2.43 (1.73, 4.65)  | n.a.                       | 1.76 (1.48, 3.42)          | 0.01    |
| HbA1c [mmol/mol]                        | 45.5 ± 11.9        | 35.1 ± 4.1                 | 37.2 ± 4.4                 | <0.001  |
| Triglycerides [mmol/L]                  | 1.74 ± 0.84        | 1.62 ± 1.19                | 1.41 ± 0.79                | 0.02    |
| Total cholesterol [mmol/L]              | 4.38 ± 1.12        | 5.02 ± 1.12                | 4.69 ± 0.92                | 0.47    |
| HDL cholesterol [mmol/L]                | 1.32 ± 0.35        | 1.21 ± 0.25                | 1.20 ± 0.32                | 0.06    |
| LDL cholesterol [mmol/L]                | 2.27 ± 0.89        | 3.15 ± 1.02                | 2.86 ± 0.89                | 0.04    |
| ALT [μkat/L]                            | 0.92 (0.74, 1.28)  | 0.42 (0.37, 0.62)          | 0.42 (0.34, 0.54)          | <0.0001 |
| AST [μkat/L]                            | 0.49 ± 0.34        | 0.39 ± 0.13                | 0.37 ± 0.12                | 0.02    |
| Urea [mmol/L]                           | 5.70 ± 2.64        | 5.29 ± 1.46                | 5.60 ± 1.40                | 0.82    |
| Creatinine [μmol/L]                     | 66.5 ± 14.7        | 71.7 ± 15.6                | 74.6 ± 15.2                | <0.0001 |
| Albumine [g/L]                          | 40.7 ± 1.9         | 47.1 ± 5.4                 | 43.0 ± 2.5                 | <0.0001 |
| Cortisol [nmol/L]                       | 214 ± 181          | n.a.                       | 241 ± 97                   | 0.68    |
| TSH [μmol/L]                            | 2.29 ± 1.54        | n.a.                       | 1.73 ± 1.13                | 0.02    |
| Triiodothyronine (T3) [pmol/L]          | 5.20 ± 0.81        | n.a.                       | 5.76 ± 0.52                | 0.002   |
| Thyroxine (T4) [pmol/L]                 | 15.8 ± 3.5         | n.a.                       | 14.5 ± 1.9                 | 0.01    |
| White blood cells [x10 <sup>9</sup> /L] | 9.93 ± 3.86        | 6.50 ± 1.57                | 5.92 ± 1.62                | <0.0001 |
| Platelets [x10 <sup>9</sup> /L]         | 243 ± 105          | 247 ± 61                   | 207 ± 54                   | 0.09    |
| D-dimer [μg/L]                          | 680 (300, 1320)    | 520 (315, 890)             | 255 (210, 530)             | <0.0001 |
| Baecke Score                            | 6.5 ± 1.3          | 7.6 ± 1.4                  | 7.5 ± 1.4                  | 0.001   |

Normally distributed variables were expressed as mean  $\pm$  standard deviation and skewed distributed variables as median and interquartile range  
P-values for differences between T0 and T6 were calculated with paired T-test for normal distributed variables, with Wilcoxon signed rank test for skewed distributed variables and via Chi-square test for categorical variables.

**Supplement Table 2:** COVID-19 Related Symptoms: Absolute number of symptom occurrences and percentage representation in the study cohort during baseline (T0) and follow-up visits (T3, T6), n = total number of participants.

| Symptoms                    | T0<br>n = 21* | T3<br>n = 37 | T6<br>n = 36 |
|-----------------------------|---------------|--------------|--------------|
| Fatigue                     | 19 (90.48 %)  | 24 (64.86 %) | 12 (33.33 %) |
| Muscle aches                | 5 (23.81 %)   | 6 (16.22 %)  | 3 (8.33 %)   |
| Joint pain                  | 1 (4.76 %)    | 6 (16.22 %)  | 8 (22.22 %)  |
| Muscle weakness/decondition | 19 (90.48 %)  | 17 (45.95 %) | 10 (27.78 %) |
| Fever                       | 2 (9.52 %)    | 0 (0.00 %)   | 0 (0.00 %)   |
| Sweating                    | 4 (19.05 %)   | 5 (13.51 %)  | 2 (5.56 %)   |
| Weight loss                 | 10* (66.67 %) | 2 (5.41 %)   | 3 (8.33 %)   |
| Reduced oral intake         | 10* (66.67 %) | 7 (18.92 %)  | 5 (13.89 %)  |
| Dyspnea                     | 12 (57.14 %)  | 19 (51.35 %) | 7 (19.44 %)  |
| Cough                       | 7 (33.33 %)   | 4 (10.81 %)  | 3 (8.33 %)   |
| Chest pain                  | 0 (0.00 %)    | 5 (13.51 %)  | 4 (11.11 %)  |
| Palpitation                 | 1 (4.76 %)    | 5 (13.51 %)  | 3 (8.33 %)   |
| Depression                  | 2 (9.52 %)    | 3 (8.11 %)   | 5 (13.89 %)  |
| Insomnia                    | 9 (42.86 %)   | 5 (13.51 %)  | 8 (22.22 %)  |
| PTSD                        | 3 (14.29 %)   | 0 (0.00 %)   | 1 (2.78 %)   |
| Loss of smell/taste         | 5 (23.81 %)   | 2 (5.41 %)   | 2 (5.56 %)   |
| Cefalea                     | 2 (9.52 %)    | 4 (10.81 %)  | 5 (13.89 %)  |
| Cognitive impairment        | 1 (10.00 %)** | 6 (16.22 %)  | 6 (16.67 %)  |
| Diarhoe                     | 0 (0.00 %)    | 2 (5.41 %)   | 3 (8.33 %)   |
| Hair loss                   | 4 (19.05 %)   | 17 (45.95 %) | 9 (25.00 %)  |
| Skin rash                   | 1 (4.76 %)    | 1 (2.70 %)   | 0 (0.00 %)   |

\* Only 21 returned questionnaires were available at T0

\*\* Only 15 participants answered the question about the symptom at T0 (n = 15).

**Supplement Table 3:** Characteristics of the study population at baseline (T0) and follow-up visit after 6 months (T6) divided by glycemia status (n=26)

|                                                      | T0                                                     |                                                     |        | T6                                                           |                                                           |      |
|------------------------------------------------------|--------------------------------------------------------|-----------------------------------------------------|--------|--------------------------------------------------------------|-----------------------------------------------------------|------|
|                                                      | Normal glycemia<br>(IFG < 5.6 and IGT<br>< 7.8 mmol/L) | Hyperglycemia<br>(IFG ≥ 5.6 or IGT<br>≥ 7.8 mmol/L) | p      | Normal glycemia at T0<br>(IFG < 5.6 and IGT<br>< 7.8 mmol/L) | Hyperglycemia at T0<br>(IFG ≥ 5.6 or IGT<br>≥ 7.8 mmol/L) | p    |
| n                                                    | 9                                                      | 17                                                  | -      | 9                                                            | 17                                                        |      |
| Age [years]                                          | 54.5 ± 13.3                                            | 61.5 ± 6.8                                          | 0.08   | 54.5 ± 13.3                                                  | 61.5 ± 6.8                                                | 0.08 |
| Sex [n female, %]                                    | 3 (33%)                                                | 6 (35%)                                             | 0.92   | 3 (33%)                                                      | 6 (35%)                                                   | 0.92 |
| BMI [kg/m <sup>2</sup> ]                             | 31.7 ± 4.5                                             | 29.8 ± 5.0                                          | 0.35   | 32.9 ± 4.3                                                   | 31.0 ± 4.7                                                | 0.30 |
| Body weight [kg]                                     | 93.6 ± 16.9                                            | 89.7 ± 14.9                                         | 0.55   | 97.5 ± 17.5                                                  | 93.2 ± 14.3                                               | 0.51 |
| WHR                                                  | 0.95 ± 0.07                                            | 0.94 ± 0.09                                         | 0.77   | 0.94 ± 0.07                                                  | 0.92 ± 0.09                                               | 0.69 |
| Fat mass [%]                                         | 25 ± 12                                                | 24 ± 9                                              | 0.91   | 30 ± 19                                                      | 24 ± 9                                                    | 0.25 |
| Systolic blood pressure [mmHg]                       | 130 ± 11                                               | 133 ± 18                                            | 0.65   | 132 ± 17                                                     | 137 ± 18                                                  | 0.50 |
| Diastolic blood pressure [mmHg]                      | 83 ± 4                                                 | 85 ± 8                                              | 0.52   | 83 ± 4                                                       | 85 ± 11                                                   | 0.55 |
| First random glucose [mmol/L]                        | 5.9 (5.7, 6.4)                                         | 6.7 (6.3, 8.4)                                      | 0.02   | -                                                            | -                                                         | -    |
| Fasting glucose [mmol/L]                             | 4.7 ± 0.5                                              | 5.7 ± 1.2                                           | 0.03   | 5.0 ± 0.4                                                    | 5.6 ± 0.6                                                 | 0.02 |
| Glucose after 2 hours [mmol/L]                       | 6.9 ± 0.7                                              | 10.3 ± 2.3                                          | <0.001 | 6.7 ± 0.8                                                    | 8.1 ± 2.0                                                 | 0.05 |
| Fasting insulin [mIU/L]                              | 13.1 ± 8.8                                             | 15.1 ± 6.7                                          | 0.52   | 9.3 ± 3.5                                                    | 12.0 ± 9.4                                                | 0.42 |
| Insulin after 2 hours [mIU/L]                        | 103.0 ± 64.5                                           | 75.2 ± 30.4                                         | 0.14   | 62.6 ± 41.6                                                  | 74.6 ± 57.6                                               | 0.59 |
| Fasting C-peptide [pmol/L]                           | 940 ± 276                                              | 863 ± 275                                           | 0.50   | 513 ± 64                                                     | 584 ± 264                                                 | 0.44 |
| C-peptide after 2 hours [pmol/L]                     | 3682 ± 877                                             | 3159 ± 704                                          | 0.11   | 2242 ± 619                                                   | 2349 ± 777                                                | 0.72 |
| Fasting NEFA [mmol/L]                                | 0.91 ± 0.25                                            | 0.99 ± 0.26                                         | 0.46   | 0.71 ± 0.37                                                  | 0.80 ± 0.20                                               | 0.45 |
| NEFA after 2 hours [mmol/L]                          | 0.51 ± 0.17                                            | 0.59 ± 0.22                                         | 0.37   | 0.29 ± 0.13                                                  | 0.36 ± 0.14                                               | 0.26 |
| Fasting glycerol [μmol/L]                            | 250 ± 58                                               | 266 ± 80                                            | 0.61   | 152 ± 59                                                     | 159 ± 41                                                  | 0.72 |
| Glycerol after 2 hours [μmol/L]                      | 222 ± 44                                               | 215 ± 59                                            | 0.76   | 113 ± 29                                                     | 125 ± 23                                                  | 0.27 |
| Insulinogenic index                                  | 2.78 ± 1.77                                            | 1.01 ± 0.51                                         | 0.001  | 1.35 ± 0.64                                                  | 1.57 ± 2.28                                               | 0.78 |
| Insulin sensitivity index                            | 3.47 ± 1.78                                            | 3.12 ± 1.23                                         | 0.57   | 4.56 ± 1.27                                                  | 4.52 ± 2.75                                               | 0.97 |
| Disposition Index                                    | 8.40 ± 5.42                                            | 3.05 ± 1.79                                         | 0.002  | 5.67 ± 1.98                                                  | 4.45 ± 2.83                                               | 0.26 |
| HOMA-beta                                            | 1.63 ± 1.07                                            | 2.00 ± 0.92                                         | 0.36   | 1.20 ± 0.41                                                  | 1.60 ± 1.24                                               | 0.37 |
| HOMA-IR                                              | 2.69 ± 1.87                                            | 4.03 ± 2.44                                         | 0.17   | 2.04 ± 0.62                                                  | 3.20 ± 2.83                                               | 0.24 |
| REE <sub>Harris Benedict</sub> [kcal/d]              | 1776 ± 330                                             | 1687 ± 237                                          | 0.44   | 1827 ± 342                                                   | 1735 ± 289                                                | 0.43 |
| REE <sub>0</sub> [kcal/d]                            | 2058 ± 283                                             | 2048 ± 359                                          | 0.94   | 1711 ± 329                                                   | 1784 ± 265                                                | 0.54 |
| REE <sub>120</sub> [kcal/d]                          | 2148 ± 274                                             | 2147 ± 341                                          | 0.99   | 1844 ± 250                                                   | 1966 ± 288                                                | 0.29 |
| ΔREE <sub>120-0</sub> [kcal/d]                       | 90 ± 213                                               | 121 ± 179                                           | 0.70   | 133 ± 96                                                     | 182 ± 125                                                 | 0.32 |
| REE <sub>0</sub> /REE <sub>Harris Benedict</sub> [%] | 117 ± 12                                               | 122 ± 15                                            | 0.45   | 94 ± 6                                                       | 103 ± 9                                                   | 0.01 |
| REE <sub>0</sub> /ATM ratio [kcal/kg]                | 29.9 ± 3.9                                             | 30.5 ± 4.1                                          | 0.71   | 24.0 ± 2.6                                                   | 25.4 ± 2.3                                                | 0.18 |

|                                         |                   |                   |      |                   |                   |      |
|-----------------------------------------|-------------------|-------------------|------|-------------------|-------------------|------|
| RQ <sub>0</sub>                         | 0.70 ± 0.06       | 0.70 ± 0.08       | 0.94 | 0.76 ± 0.05       | 0.73 ± 0.04       | 0.13 |
| RQ <sub>120</sub>                       | 0.79 ± 0.09       | 0.80 ± 0.09       | 0.90 | 0.79 ± 0.09       | 0.80 ± 0.09       | 0.90 |
| ΔRQ <sub>120-0</sub>                    | 0.09 ± 0.06       | 0.10 ± 0.08       | 0.83 | 0.09 ± 0.06       | 0.06 ± 0.05       | 0.20 |
| HbA1c [mmol/mol]                        | 41.4 ± 3.0        | 50.5 ± 15.7       | 0.10 | 35.9 ± 2.4        | 38.9 ± 4.6        | 0.08 |
| Triglycerides [mmol/L]                  | 1.66 ± 0.55       | 1.82 ± 1.04       | 0.68 | 1.34 ± 0.55       | 1.59 ± 0.95       | 0.48 |
| Total cholesterol [mmol/L]              | 4.15 ± 0.78       | 4.48 ± 0.87       | 0.36 | 4.64 ± 1.14       | 4.84 ± 0.82       | 0.60 |
| HDL cholesterol [mmol/L]                | 1.36 ± 0.40       | 1.26 ± 0.32       | 0.53 | 1.19 ± 0.20       | 1.19 ± 0.39       | 1.00 |
| LDL cholesterol [mmol/L]                | 2.05 ± 0.74       | 2.37 ± 0.79       | 0.33 | 2.84 ± 1.10       | 2.94 ± 0.82       | 0.80 |
| ALT [μkat/L]                            | 1.16 ± 0.45       | 1.08 ± 0.64       | 0.74 | 0.42 ± 0.12       | 0.48 ± 0.22       | 0.45 |
| AST [μkat/L]                            | 0.43 ± 0.16       | 0.52 ± 0.22       | 0.29 | 0.31 ± 0.07       | 0.39 ± 0.11       | 0.06 |
| Urea [mmol/L]                           | 5.06 ± 3.43       | 5.87 ± 2.48       | 0.49 | 5.30 ± 1.72       | 6.00 ± 1.23       | 0.24 |
| Creatinine [μmol/L]                     | 73.8 ± 22.1       | 66.0 ± 10.2       | 0.23 | 76.3 ± 19.2       | 75.5 ± 14.1       | 0.90 |
| Albumine [g/L]                          | 40.0 ± 2.1        | 40.5 ± 1.9        | 0.52 | 43.5 ± 3.3        | 42.8 ± 2.2        | 0.52 |
| Cortisol [nmol/L]                       | 267 ± 175         | 254 ± 194         | 0.87 | 288 ± 87          | 229 ± 104         | 0.15 |
| TSH [μmol/L]                            | 1.58 (1.41, 1.84) | 2.08 (1.71, 3.75) | 0.05 | 1.49 (1.23, 1.88) | 1.53 (1.41, 1.73) | 0.98 |
| Triiodothyronine (T3) [pmol/L]          | 5.38 ± 0.89       | 5.19 ± 0.63       | 0.53 | 5.67 ± 0.50       | 5.77 ± 0.55       | 0.65 |
| Thyroxine (T4) [pmol/L]                 | 17.2 ± 3.4        | 15.2 ± 3.7        | 0.20 | 15.3 ± 1.6        | 14.2 ± 2.0        | 0.16 |
| White blood cells [x10 <sup>9</sup> /L] | 8.77 ± 2.28       | 10.12 ± 4.81      | 0.44 | 6.46 ± 1.79       | 5.87 ± 1.62       | 0.40 |
| Platelets [x10 <sup>9</sup> /L]         | 226 ± 86          | 237 ± 126         | 0.81 | 222 ± 69          | 204 ± 52          | 0.46 |
| D-dimer [μg/L]                          | 850 (340, 1210)   | 1130 (420, 2140)  | 0.54 | 350 (220, 540)    | 235 (200, 515)    | 0.34 |
| Baecke Score                            | 5.9 ± 1.0         | 6.9 ± 1.4         | 0.08 | 7.3 ± 1.4         | 8.7 ± 1.5         | 0.51 |

Normally distributed variables were expressed as mean ± standard deviation and skewed distributed variables as median and interquartile range

P-values for differences between normal glycaemic and hyperglycaemic group at T0 and T6, respectively, were calculated with unpaired T-test for normal distributed variables, with Wilcoxon signed rank test for skewed distributed variables and via Chi-square test for categorical variables

**Supplement Table 4:** Sensitivity Analysis: Baseline characteristics of the study population without excluding participants at baseline (T0) that were lost to follow-up at 6 months (T6) divided by glycemia status (n=37)

|                                                      | Normal glycemia<br>(IFG < 5.6 and IGT<br>< 7.8 mmol/L) | Hyperglycemia<br>(IFG ≥ 5.6 or IGT<br>≥ 7.8 mmol/L) | p       |
|------------------------------------------------------|--------------------------------------------------------|-----------------------------------------------------|---------|
| n                                                    | 15                                                     | 22                                                  | -       |
| Age [years]                                          | 53.2 ± 11.6                                            | 58.4 ± 8.9                                          | 0.13    |
| Sex [n female, %]                                    | 7 (47%)                                                | 7 (32%)                                             | 0.36    |
| BMI [kg/m <sup>2</sup> ]                             | 32.2 ± 5.6                                             | 29.3 ± 4.4                                          | 0.09    |
| Body weight [kg]                                     | 94.3 ± 19.2                                            | 88.1 ± 14.2                                         | 0.27    |
| WHR                                                  | 0.92 ± 0.08                                            | 0.94 ± 0.08                                         | 0.58    |
| Fat mass [%]                                         | 27 ± 12                                                | 24 ± 9                                              | 0.38    |
| Systolic blood pressure [mmHg]                       | 127 ± 11                                               | 134 ± 18                                            | 0.18    |
| Diastolic blood pressure [mmHg]                      | 82 ± 5                                                 | 85 ± 7                                              | 0.20    |
| First random glucose [mmol/L]                        | 6.0 (5.7, 6.2)                                         | 6.9 (6.3, 7.5)                                      | 0.002   |
| Fasting glucose [mmol/L]                             | 4.7 ± 0.6                                              | 5.7 ± 1.1                                           | 0.004   |
| Glucose after 2 hours [mmol/L]                       | 6.5 ± 1.0                                              | 9.8 ± 2.4                                           | <0.0001 |
| Fasting insulin [mIU/L]                              | 12.7 ± 8.3                                             | 14.8 ± 6.7                                          | 0.40    |
| Insulin after 2 hours [mIU/L]                        | 87.6 ± 56.2                                            | 87.1 ± 47.6                                         | 0.97    |
| Fasting C-peptide [pmol/L]                           | 941 ± 391                                              | 889 ± 301                                           | 0.65    |
| C-peptide after 2 hours [pmol/L]                     | 3476 ± 1074                                            | 3324 ± 981                                          | 0.66    |
| Fasting NEFA [mmol/L]                                | 0.89 ± 0.24                                            | 0.95 ± 0.25                                         | 0.46    |
| NEFA after 2 hours [mmol/L]                          | 0.53 ± 0.16                                            | 0.57 ± 0.22                                         | 0.61    |
| Fasting glycerol [μmol/L]                            | 244 ± 55                                               | 256 ± 81                                            | 0.65    |
| Glycerol after 2 hours [μmol/L]                      | 214 ± 53                                               | 215 ± 68                                            | 0.99    |
| Insulinogenic index                                  | 2.68 (1.46, 4.06)                                      | 0.96 (0.76, 1.47)                                   | 0.001   |
| Insulin sensitivity index                            | 3.77 ± 1.89                                            | 2.99 ± 1.18                                         | 0.15    |
| Disposition Index                                    | 8.92 (4.94, 16.97)                                     | 3.04 (1.59, 4.74)                                   | 0.003   |
| HOMA-beta                                            | 1.59 ± 1.02                                            | 1.96 ± 0.92                                         | 0.26    |
| HOMA-IR                                              | 2.64 ± 1.84                                            | 3.91 ± 2.34                                         | 0.09    |
| REE <sub>Harris Benedict</sub> [kcal/d]              | 1772 ± 361                                             | 1694 ± 237                                          | 0.44    |
| REE <sub>0</sub> [kcal/d]                            | 2025 ± 326                                             | 2053 ± 384                                          | 0.82    |
| REE <sub>120</sub> [kcal/d]                          | 2095 ± 290                                             | 2146 ± 351                                          | 0.65    |
| ΔREE <sub>120-0</sub> [kcal/d]                       | 70 ± 229                                               | 110 ± 187                                           | 0.57    |
| REE <sub>0</sub> /REE <sub>Harris Benedict</sub> [%] | 116 ± 12                                               | 121 ± 15                                            | 0.25    |
| REE <sub>0</sub> /ATM ratio [kcal/kg]                | 30.2 ± 4.7                                             | 30.9 ± 4.1                                          | 0.65    |
| RQ <sub>0</sub>                                      | 0.72 ± 0.08                                            | 0.69 ± 0.08                                         | 0.28    |
| RQ <sub>120</sub>                                    | 0.81 ± 0.08                                            | 0.79 ± 0.09                                         | 0.31    |
| ΔRQ <sub>120-0</sub>                                 | 0.09 ± 0.07                                            | 0.09 ± 0.08                                         | 0.96    |
| HbA1c [mmol/mol]                                     | 41.0 ± 3.9                                             | 48.5 ± 14.5                                         | 0.06    |
| Triglycerides [mmol/L]                               | 1.62 ± 0.46                                            | 1.81 ± 1.02                                         | 0.50    |
| Total cholesterol [mmol/L]                           | 4.24 (3.29, 4.74)                                      | 4.44 (3.73, 5.61)                                   | 0.35    |
| HDL cholesterol [mmol/L]                             | 1.37 ± 0.33                                            | 1.29 ± 0.36                                         | 0.52    |
| LDL cholesterol [mmol/L]                             | 2.05 ± 0.82                                            | 2.41 ± 0.92                                         | 0.24    |
| ALT [μkat/L]                                         | 1.15 (0.61, 1.38)                                      | 0.89 (0.74, 1.12)                                   | 0.52    |
| AST [μkat/L]                                         | 0.40 ± 0.14                                            | 0.56 ± 0.42                                         | 0.18    |
| Urea [mmol/L]                                        | 5.39 ± 2.84                                            | 5.92 ± 2.54                                         | 0.55    |
| Creatinine [μmol/L]                                  | 69.5 ± 18.6                                            | 64.5 ± 11.4                                         | 0.32    |
| Albumine [g/L]                                       | 40.5 ± 2.1                                             | 40.8 ± 1.8                                          | 0.60    |
| Cortisol [nmol/L]                                    | 196 ± 174                                              | 226 ± 189                                           | 0.62    |
| TSH [μmol/L]                                         | 1.69 (1.38, 2.90)                                      | 1.94 (1.50, 2.66)                                   | 0.51    |
| Triiodothyronine (T3) [pmol/L]                       | 5.34 ± 0.93                                            | 5.10 ± 0.72                                         | 0.37    |
| Thyroxine (T4) [pmol/L]                              | 17.3 ± 3.3                                             | 14.8 ± 6.7                                          | 0.03    |
| White blood cells [x10 <sup>9</sup> /L]              | 9.58 ± 2.81                                            | 10.17 ± 4.49                                        | 0.65    |
| Platelets [x10 <sup>9</sup> /L]                      | 256 ± 93                                               | 235 ± 115                                           | 0.56    |
| D-dimer [μg/L]                                       | 430 (260, 1000)                                        | 680 (310, 2140)                                     | 0.25    |
| Baecke score                                         | 6.1 ± 1.2                                              | 6.8 ± 1.2                                           | 0.10    |

---

Normally distributed variables were expressed as mean  $\pm$  standard deviation and skewed distributed variables as median and interquartile range

P-values for differences between normal glycaemic and hyperglycaemic group were calculated with unpaired T-test for normal distributed variables, with Wilcoxon signed rank test for skewed distributed variables and via Chi-square test for categorical variables



**Supplement Table 5:** Sensitivity Analysis: Clinical metabolic variables at baseline (T0) and follow-up visit after 3 (T3) and 6 months (T6) and the mean difference plus 95% CI between T0 and T6 in the full data-set population

|                                                      | T0 |                 | T3 |                 | T6 |                 | $\Delta$ T6-T0 |                                   |
|------------------------------------------------------|----|-----------------|----|-----------------|----|-----------------|----------------|-----------------------------------|
|                                                      | n  | mean $\pm$ SD   | n  | mean $\pm$ SD   | n  | mean $\pm$ SD   | n              | mean difference (95% CI) <i>p</i> |
| REE <sub>Harris Benedict</sub> [kcal/d]              | 37 | 1726 $\pm$ 291  | 32 | 1759 $\pm$ 276  | 31 | 1782 $\pm$ 272  | 31             | <b>49 (34, 65)</b> <0.0001        |
| REE <sub>0</sub> [kcal/d]                            | 37 | 2042 $\pm$ 357  | 32 | 1796 $\pm$ 283  | 31 | 1756 $\pm$ 280  | 31             | <b>-302 (-393, -212)</b> <0.0001  |
| REE <sub>120</sub> [kcal/d]                          | 36 | 2125 $\pm$ 324  |    | n.a.            | 31 | 1921 $\pm$ 264  | 30             | <b>-229 (-330, -128)</b> <0.0001  |
| $\Delta$ REE <sub>120-0</sub> [kcal/d]               | 36 | 93 $\pm$ 203    |    | n.a.            | 31 | 165 $\pm$ 113   | 30             | 71 (-6, 148) 0.07                 |
| REE <sub>0</sub> /REE <sub>Harris Benedict</sub> [%] | 37 | 119 $\pm$ 14    | 32 | 102 $\pm$ 9     | 31 | 99 $\pm$ 10     | 31             | <b>-20 (-25, -16)</b> <0.0001     |
| REE <sub>0</sub> /ATH [kcal/kg]                      | 37 | 30.6 $\pm$ 4.3  | 31 | 25.4 $\pm$ 2.4  | 31 | 24.8 $\pm$ 2.6  | 31             | <b>-5.5 (-6.9, -4.1)</b> <0.0001  |
| RQ <sub>0</sub>                                      | 37 | 0.71 $\pm$ 0.08 | 32 | 0.76 $\pm$ 0.06 | 31 | 0.75 $\pm$ 0.04 | 31             | <b>0.04 (0.01, 0.07)</b> <0.01    |
| RQ <sub>120</sub>                                    | 36 | 0.80 $\pm$ 0.08 |    | n.a.            | 31 | 0.82 $\pm$ 0.05 | 30             | 0.02 (-0.01, 0.06) 0.19           |
| $\Delta$ RQ <sub>120-0</sub>                         | 36 | 0.09 $\pm$ 0.08 |    | n.a.            | 31 | 0.07 $\pm$ 0.05 | 30             | -0.02 (-0.05, 0.01) 0.23          |

Data are shown as mean  $\pm$  SD. Differences between T6 and T0 are shown as mean difference  $\pm$  95% CI. P-values were derived from paired T-test.

ATM, active tissue mass; CI, confidence interval; n.a., not applicable; REE, resting energy expenditure; RQ, respiratory quotient; SD, standard deviation; T0, baseline visit; T3, visit after three months; T6, visit after six month

**Supplement Table 6:** Sensitivity Analysis: Outcome indices at baseline (T0) and follow-up visit after 6 months (T6) and the mean differences or median of differences plus 95% CI between these visits in the normal glycaemic and hyperglycaemic groups in the full data-set

|                           | Normal glycaemia                                          | Hyperglycaemia                | Adjusted group differences                                |          |
|---------------------------|-----------------------------------------------------------|-------------------------------|-----------------------------------------------------------|----------|
|                           | <b>T0 (n=37)</b>                                          |                               |                                                           |          |
|                           | mean $\pm$ SD / median (IQR)*                             | mean $\pm$ SD / median (IQR)* | mean difference (95% CI) / median of difference (95% CI)* | <i>p</i> |
| Insulinogenic index*      | 2.68 (1.46, 4.06)                                         | 0.96 (0.76, 1.47)             | <b>-1.32 (-2.43, -0.21)</b>                               | 0.02     |
| Insulin sensitivity index | 3.77 $\pm$ 1.89                                           | 2.99 $\pm$ 1.18               | <b>-1.23 (-2.29, -0.17)</b>                               | 0.02     |
| Disposition Index*        | 8.92 (4.94, 16.97)                                        | 3.04 (1.59, 4.74)             | -4.58 (-10.42, 1.27)                                      | 0.12     |
| HOMA-beta                 | 1.59 $\pm$ 1.02                                           | 1.96 $\pm$ 0.92               | <b>0.65 (0.00, 1.29)</b>                                  | 0.05     |
| HOMA-IR                   | 2.64 $\pm$ 1.84                                           | 3.91 $\pm$ 2.34               | <b>1.85 (0.39, 3.30)</b>                                  | 0.01     |
|                           | <b>T6 (n=31)</b>                                          |                               |                                                           |          |
| Insulinogenic index*      | 1.50 (0.99, 2.26)                                         | 1.15 (0.60, 1.55)             | -0.48 (-4.63, 3.67)                                       | 0.82     |
| Insulin sensitivity index | 5.03 $\pm$ 2.17                                           | 4.56 $\pm$ 2.59               | -0.71 (-2.52, 1.11)                                       | 0.43     |
| Disposition Index*        | 5.96 (4.80, 8.42)                                         | 4.32 (2.96, 6.89)             | -1.57 (-6.01, 2.88)                                       | 0.48     |
| HOMA-beta                 | 1.18 $\pm$ 0.48                                           | 1.53 $\pm$ 1.18               | 0.48 (-0.27, 1.23)                                        | 0.20     |
| HOMA-IR                   | 2.04 $\pm$ 0.81                                           | 3.05 $\pm$ 2.70               | 1.25 (-0.45, 2.94)                                        | 0.14     |
|                           | <b><math>\Delta</math>T6-T0 (n=31)</b>                    |                               |                                                           |          |
|                           | Normal glycaemia                                          |                               | Hyperglycaemia                                            |          |
|                           | mean difference (95% CI) / median of difference (95% CI)* |                               | mean difference (95% CI) / median of difference (95% CI)* |          |
| Insulinogenic index*      | -0.85 (-2.59, 4.75)                                       | 0.41                          | -0.02 (-0.16, 0.37)                                       | 0.73     |
| Insulin sensitivity index | +0.98 (-0.24, 2.21)                                       | 0.10                          | <b>+1.93 (0.71, 3.15)</b>                                 | 0.004    |
| Disposition Index*        | 0.67 (-7.18, 21.69)                                       | 0.83                          | 1.71 (-0.17, 2.92)                                        | 0.21     |
| HOMA-beta                 | -0.32 (-0.83, 0.20)                                       | 0.20                          | <b>-0.58 (-1.02, -0.15)</b>                               | 0.01     |
| HOMA-IR                   | -0.44 (-1.35, 0.47)                                       | 0.31                          | <b>-1.22 (-2.15, -0.28)</b>                               | 0.01     |

Data are shown as mean  $\pm$  SD. Differences between the normal glycaemic and hyperglycaemic group are shown as mean difference  $\pm$  95% CI adjusted for age, sex and BMI. P-values were derived from unpaired T-test.

Differences over time between T6 and T0 were derived from paired T-test

CI, confidence interval; HOMA-beta, homeostasis model assessment of beta cell function; HOMA-IR, homeostasis model assessment of insulin resistance; SD, standard deviation; T0, baseline visit; T6, visit after six month;  $\Delta$ T6-T0, change between T6 and T0;

\* skewed distributed variables are shown as median and IQR and median of difference and 95% CI

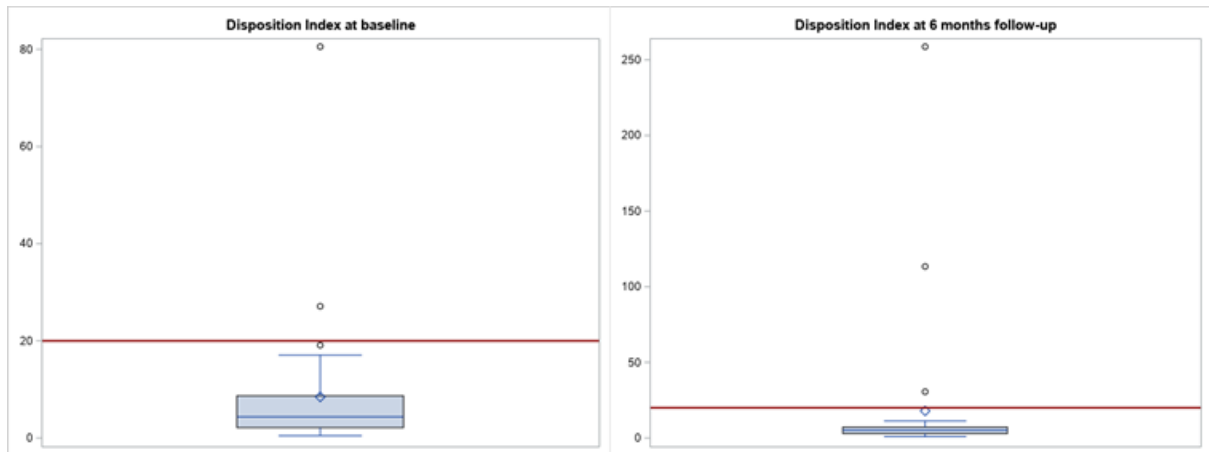

Excluded extreme outliers were: patients with a disposition index of 27.1 and 80.6 at baseline and with values of 30.6, 113.4 and 258.7 at follow-up after 6 months

**Supplement Figure 1:** Distribution of the disposition index (DI) at baseline and after 6 months follow-up: boxplots are showing extreme outliers that were excluded from the main analysis.

## STROBE Flow Diagram

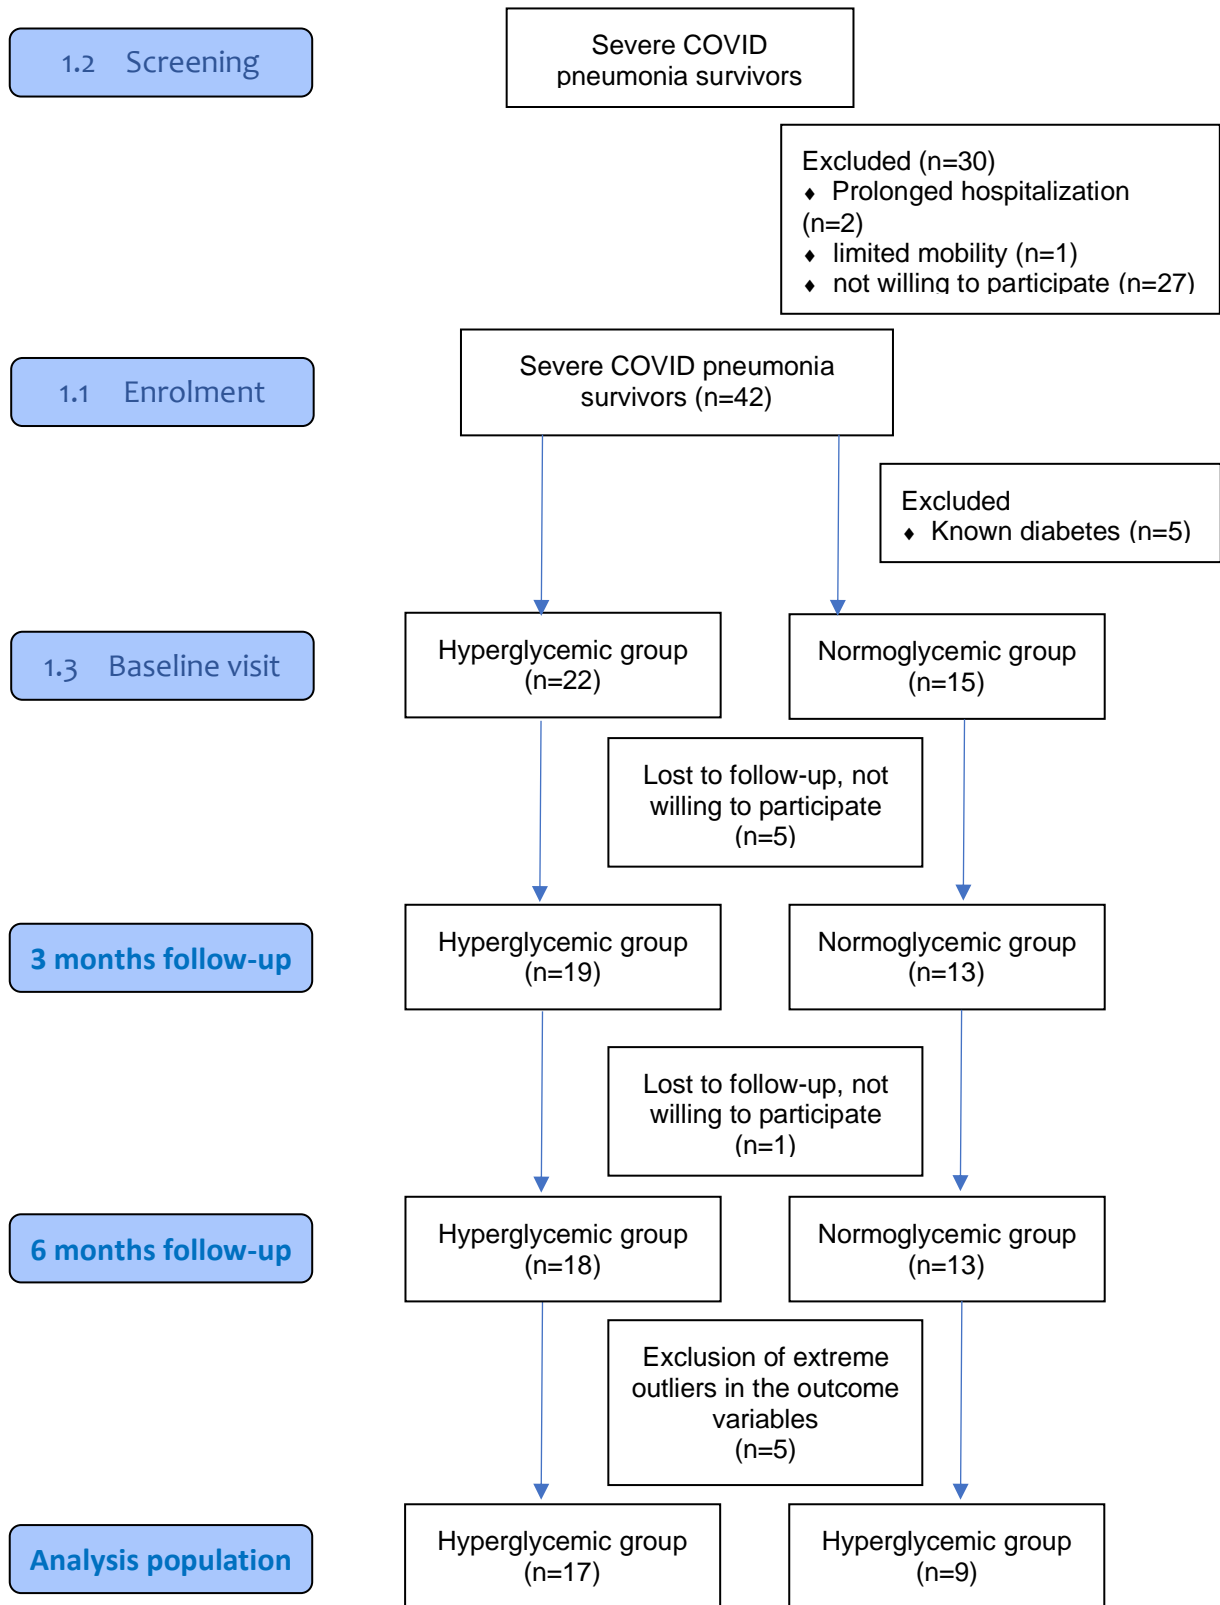

**Supplement Figure 2:** STROBE flow diagram. From 37 subjects enrolled and examined at the T0 5 patients were considered as outliers in the major outcome variables and were not included in the final analysis.

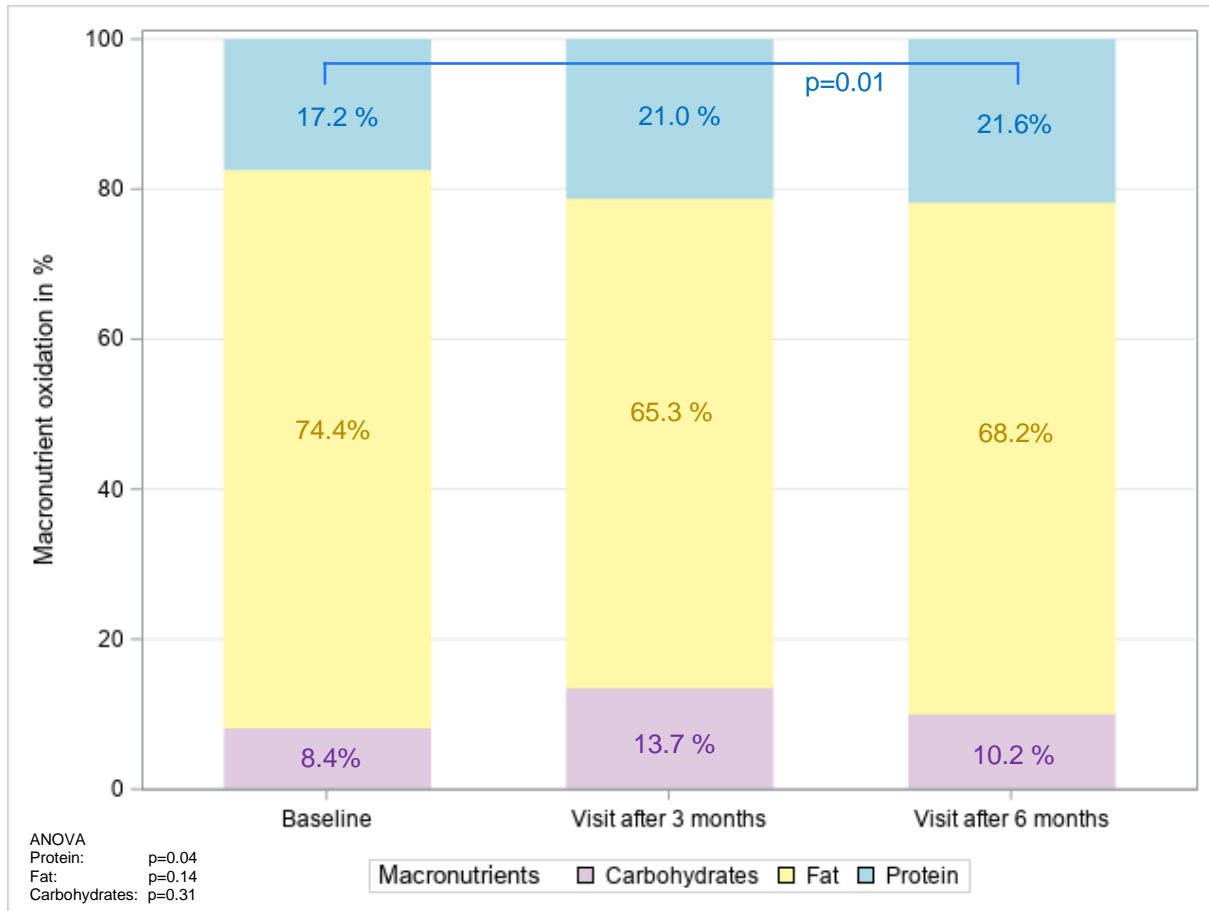

Differences between macronutrient oxidation at baseline and follow-up after 3 and 6 months were tested via repeated measures ANOVA including p-values for differences between two or all three time points; \*p-values <0.05 indicating differences in time for macronutrient oxidation between two time points for protein between baseline and visit after 6 months (p= 0.01)

**Supplement Figure 1:** Oxidation of carbohydrates, fat and protein expressed as a share from 100% at baseline (n=37) and follow-up after 3 months (n=32) and 6 months (n=31) in the full data-set
